# Supplementary material for: Graphene oxide-based polymeric membranes for broad water pollutant removal
Source: Royal Society of Chemistry journal article supplement (doi:10.1039/c5ra20243d), 2015-01-01
Supplement: c5ra20243d1.pdf [file c5ra20243d1.pdf]

# Graphene oxide-based polymeric membranes for broad water pollutants removal

Xiang Zhang<sup>a</sup>, Ying Liu<sup>a</sup>, Chuangchao Sun<sup>a</sup>, Haifeng Ji<sup>a</sup>, Weifeng Zhao<sup>†a,b</sup>, Shudong Sun<sup>a</sup> and Changsheng Zhao<sup>†a</sup>

<sup>a</sup> College of Polymer Science and Engineering, State Key Laboratory of Polymer Materials Engineering, Sichuan University, Chengdu 610065, China.

<sup>b</sup> Fiber and Polymer Technology, School of Chemical Science and Engineering, Royal Institute of Technology (KTH), Teknikringen 56-58 SE-100 44, Stockholm, Sweden.

† Corresponding author: Weifeng Zhao, e-mail: zhaoscukth@163.com; Changsheng Zhao, e-mail: zhaochsh70@163.com.

## Supplementary Material

### Preparation of graphene oxide (GO)

GO was prepared by a modified Hummers method. Briefly, 5 g of graphite, 3.75 g of NaNO<sub>3</sub> and 150 mL of H<sub>2</sub>SO<sub>4</sub> were placed in a flask. 20 g of KMnO<sub>4</sub> was slowly added to the flask with gentle stirring in an ice-water bath. Then the mixture was vigorously stirred at 40 °C in a water bath. The viscosity of the mixture will increase dramatically after certain reaction time (usually 12 hours), and then the stirring could be turned off. The reaction was kept for three days, the obtained brown mud was diluted with DI water (500 mL) slowly, and the insoluble precipitations were then removed by centrifugation. The resulted GO solution was dialyzed with DI water for one week, and concentrated by centrifugation.

**The fitting results of pseudo-first-order model and pseudo-second-order model.**

Table S1

The parameters of pseudo-first-order model and pseudo-second-order model.

|        | pseudo-first-order model |                     |       | pseudo-second-order model |                     |       |
|--------|--------------------------|---------------------|-------|---------------------------|---------------------|-------|
|        | $k_1$ (1/min)            | $q_{e(cal)}$ (mg/g) | $r^2$ | $k_2$ (g/mg·min)          | $q_{e(cal)}$ (mg/g) | $r^2$ |
| M-GO3  | $8.9 \times 10^{-3}$     | 16.73               | 0.98  | $1.10 \times 10^{-3}$     | 29.41               | 0.99  |
| M-GO6  | $9.9 \times 10^{-3}$     | 25.68               | 0.99  | $6.93 \times 10^{-4}$     | 37.74               | 0.99  |
| M-RGO3 | $10.6 \times 10^{-3}$    | 10.29               | 0.94  | $1.07 \times 10^{-3}$     | 14.01               | 0.98  |
| M-RGO6 | $9.4 \times 10^{-3}$     | 11.99               | 0.95  | $7.93 \times 10^{-4}$     | 18.98               | 0.98  |
| M-PEI3 | $8.6 \times 10^{-3}$     | 29.76               | 0.99  | $3.61 \times 10^{-4}$     | 35.34               | 0.99  |
| M-PEI6 | $8.6 \times 10^{-3}$     | 58.82               | 0.98  | $1.46 \times 10^{-4}$     | 60.97               | 0.99  |

### The fitting results of intraparticle diffusion model.

Table S2

The parameter of intraparticle diffusion model.

|        | C (mg/g) | Step I                           |       | Step II                          |       |
|--------|----------|----------------------------------|-------|----------------------------------|-------|
|        |          | $k_1$ (mg/g·min <sup>1/2</sup> ) | $r^2$ | $k_2$ (mg/g·min <sup>1/2</sup> ) | $r^2$ |
| M-GO3  | 6.01     | 1.53                             | 0.98  | 0.11                             | 0.98  |
| M-GO6  | 6.59     | 1.90                             | 0.99  | 0.11                             | 0.99  |
| M-ROG3 | -2.87    | 1.13                             | 0.98  | 0.06                             | 0.99  |
| M-RGO6 | -3.87    | 1.54                             | 0.98  | 0.07                             | 0.99  |
| M-PEI3 | 1.02     | 1.75                             | 0.99  | 0.27                             | 0.98  |
| M-PEI6 | 0.58     | 2.62                             | 0.99  | 0.76                             | 0.97  |

**The fitting results of Langmuir adsorption isotherm.**

Table S3

The parameters of Langmuir adsorption isotherm.

|        | $q_{\max}$ (mg/g) | $k_L$ (L/mg) | $r_L^2$ |
|--------|-------------------|--------------|---------|
| M-GO3  | 33.48             | 0.18         | 0.99    |
| M-GO6  | 43.86             | 0.17         | 0.99    |
| M-RGO3 | 16.14             | 0.04         | 0.99    |
| M-RGO6 | 21.63             | 0.11         | 0.99    |
| M-PEI3 | 36.94             | 0.14         | 0.99    |
| M-PEI6 | 63.05             | 0.57         | 0.99    |

### The analysis results of thermodynamics.

Table S4

The parameters of thermodynamics.

|        | $\Delta H^0$<br>(kJ/mol) | $\Delta S^0$<br>(J/mol·K) | $\Delta G^0$ (kJ/mol) |         |         |         |         | $r^2$ |
|--------|--------------------------|---------------------------|-----------------------|---------|---------|---------|---------|-------|
|        |                          |                           | 293.15k               | 303.15k | 313.15k | 323.15k | 333.15k |       |
| M-GO3  | -22.59                   | -17.07                    | -17.59                | -17.42  | -17.24  | -17.07  | -16.90  | 0.99  |
| M-GO6  | -39.82                   | -59.53                    | -22.37                | -21.77  | -21.18  | -20.58  | -19.99  | 0.99  |
| M-RGO3 | -23.97                   | -33.03                    | -14.29                | -13.96  | -13.63  | -13.30  | -12.96  | 0.99  |
| M-RGO6 | -34.12                   | -59.66                    | -16.63                | -16.03  | -15.44  | -14.84  | -14.24  | 0.99  |
| M-PEI3 | -20.98                   | -14.85                    | -16.63                | -16.48  | -16.33  | -16.18  | -16.03  | 0.98  |
| M-PEI6 | -30.19                   | -32.69                    | -20.61                | -20.28  | -19.95  | -19.62  | -19.30  | 0.98  |
